# Supplementary material
Source: publisher figshare collection journal article supplement (https://acs.figshare.com/ndownloader/files/9624862)
Supplement: Supplementary file 1 [file 9624862]

## Supporting Information

### CO Adsorption on Au/TiO<sub>2</sub> Catalysts:

#### Observations, Quantification, and Explanation of a Broad-Band Infrared Signal

Camilah D. Powell, Arthur W. Daigh, Meagan Pollock,

Bert D. Chandler, and Christopher J. Pursell\*

*Department of Chemistry, Trinity University, One Trinity Place, San Antonio, Texas 78212*

*\*Corresponding Author: cpursell@trinity.edu (210)999-7381*

The catalysts used in this study were commercial samples purchased from STREM Chemicals (nominal 1% Au/Al<sub>2</sub>O<sub>3</sub> and Au/TiO<sub>2</sub>). These catalysts were pretreated by the manufacturer to ensure that particles were of appropriate size ( $2.9 \pm 0.9$  nm, Fig. S1) to be active for CO oxidation.

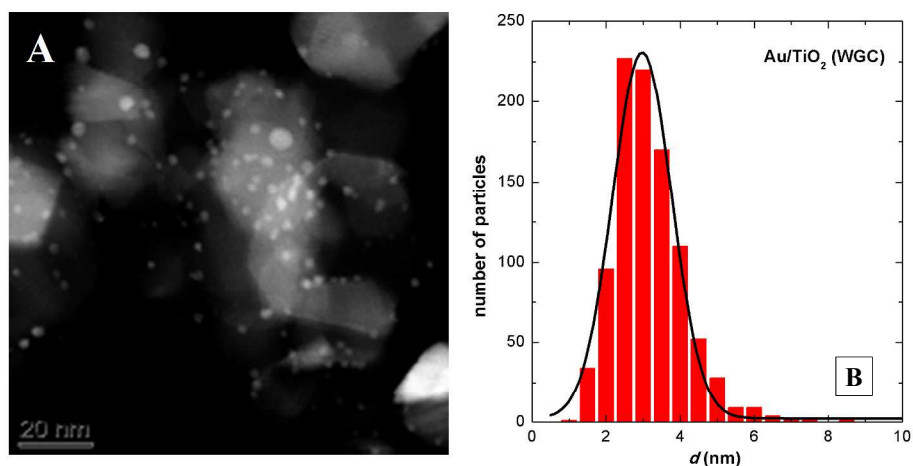

**Figure S1.** TEM data for Au/TiO<sub>2</sub>. TEM micrograph (A) and Particle size distribution (B) of the catalysts used in this study. Mean calculated particle size is  $2.9 \pm 0.9$  nm.

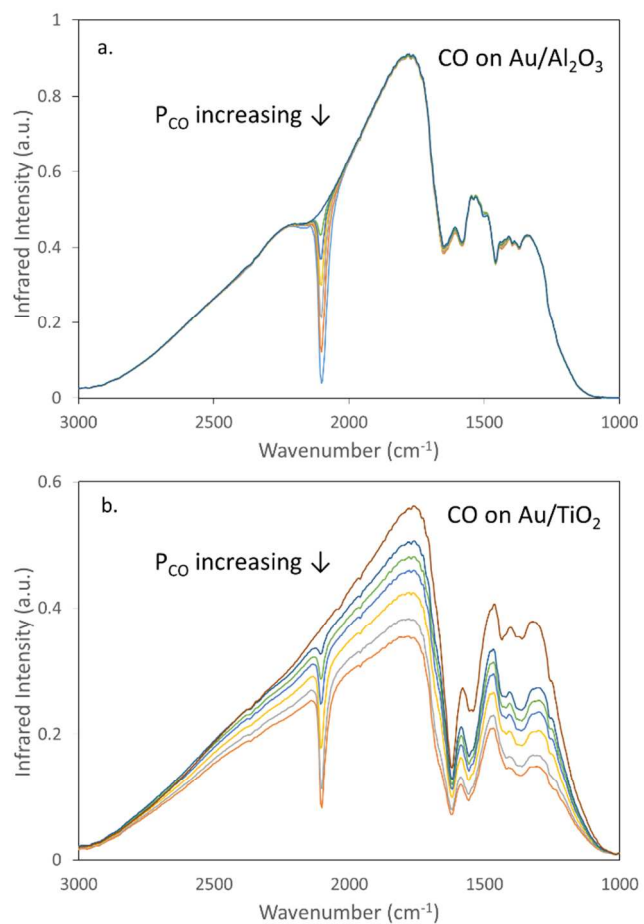

**Figure S2.** IR transmission spectra for CO adsorption on (a) Au/Al<sub>2</sub>O<sub>3</sub> and (b) Au/TiO<sub>2</sub> catalysts (at room temperature for P<sub>CO</sub> = 1-20 Torr).

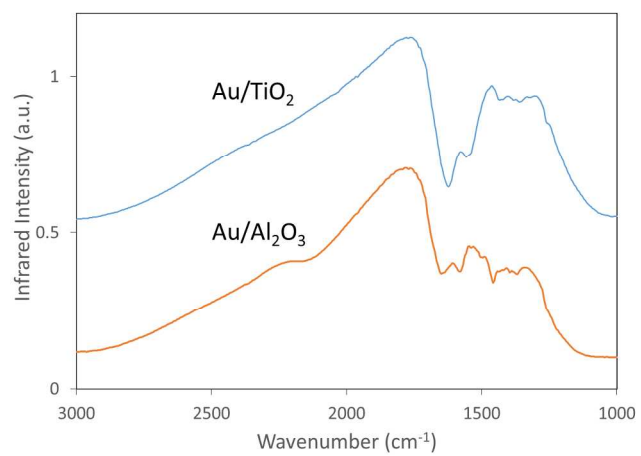

**Figure S3.** IR transmission spectra for Au/TiO<sub>2</sub> and Au/Al<sub>2</sub>O<sub>3</sub> catalysts (in the absence of CO).

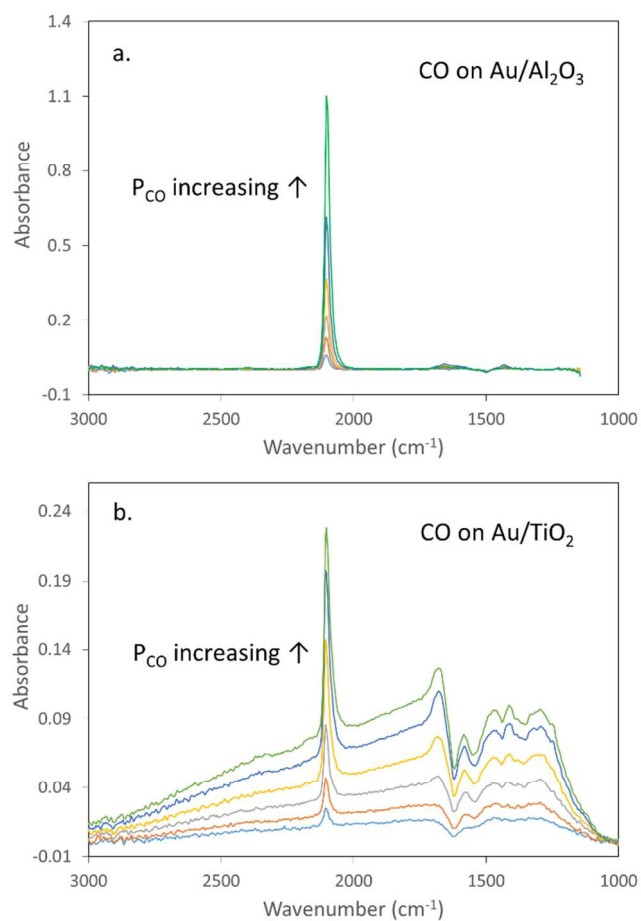

**Figure S4.** IR absorbance spectra for CO adsorption on (a) Au/Al<sub>2</sub>O<sub>3</sub> and (b) Au/TiO<sub>2</sub> catalysts (at room temperature for P<sub>CO</sub> = 1-20 Torr).

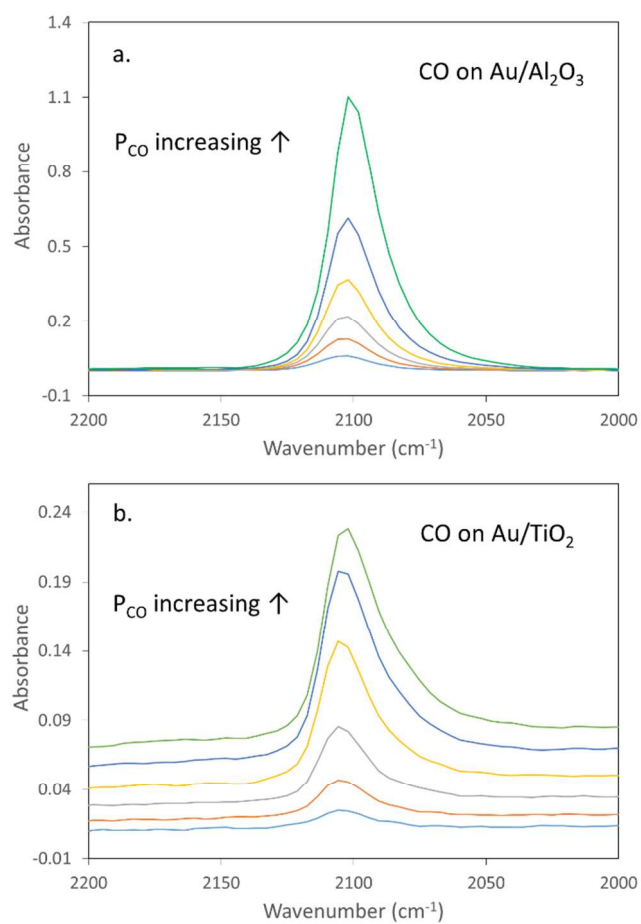

**Figure S5.** IR absorbance spectra for CO adsorption on (a)  $\text{Au}/\text{Al}_2\text{O}_3$  and (b)  $\text{Au}/\text{TiO}_2$  catalysts (at room temperature for  $P_{\text{CO}} = 1\text{-}20$  Torr); same spectra as Figure 3 but plotted over a narrower frequency range.

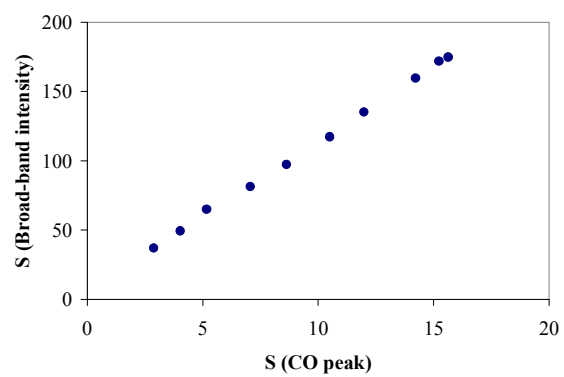

**Figure S6.** Correlation plot of the BB-IR and the Au-CO IR peak integrated absorbance signals.

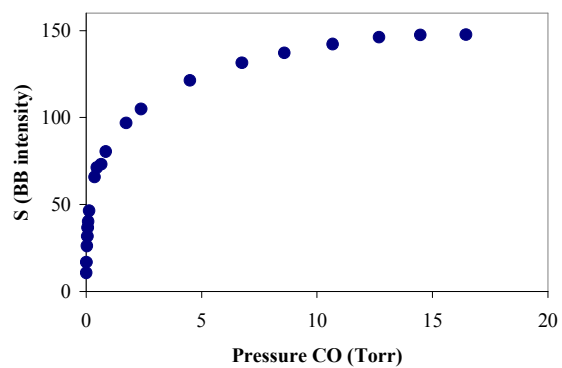

**Figure S7.** Isotherm for CO adsorption on Au/TiO<sub>2</sub> (at room temperature) using the BB-IR integrated absorbance signal.

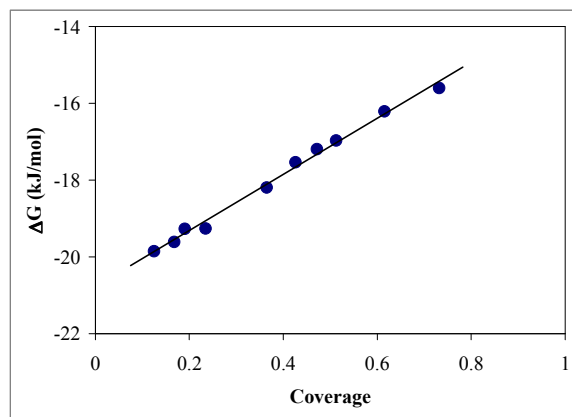

**Figure S8.** Temkin plot using the BB-IR signal. This plot give  $\Delta H_0 = -62.4$  kJ/mol and  $\delta\Delta H = -7.3$  kJ/mol (see text for details).



**Table S1.** Temkin metrics for CO adsorption on Au/TiO<sub>2</sub> determined from CO IR peak and BB-IR signal.

|                    | <b><math>-\Delta H_{\theta}</math> (kJ/mol)</b> | <b><math>-\delta\Delta H</math> (kJ/mol)</b> |
|--------------------|-------------------------------------------------|----------------------------------------------|
| S (CO peak signal) | 61.3 ± 0.4                                      | 7.3 ± 0.9                                    |
| S (BB-IR signal)   | 62.3 ± 0.7                                      | 7.3 ± 0.9                                    |
